# Supplementary material for: Co3O4-based binder-free cathodes for lithium–oxygen batteries with improved cycling stability
Source: Royal Society of Chemistry journal article supplement (doi:10.1039/c5dt00498e), 2015-01-01
Supplement: c5dt00498e1.pdf [file c5dt00498e1.pdf]

## Electronic Supplementary Information

### **Co<sub>3</sub>O<sub>4</sub>-based Binder-Free Cathodes for Lithium–Oxygen Batteries with Improved Cycling Stability**

Shu-Mao Xu,<sup>‡</sup> Qian-Cheng Zhu,<sup>‡</sup> Fei-Hu Du, Xin-Hao Li, Xiao Wei, Kai-Xue Wang,<sup>\*</sup> and Jie-Sheng Chen<sup>\*</sup>

*School of Chemistry and Chemical Engineering, Shanghai Jiao Tong University,  
Shanghai 200240, China.*

<sup>\*</sup> To whom correspondence should be addressed. E-mail: k.wang@sjtu.edu.cn  
(KXW); chemcj@sjtu.edu.cn (JSC)

<sup>‡</sup> Those authors contribute to this work equally.

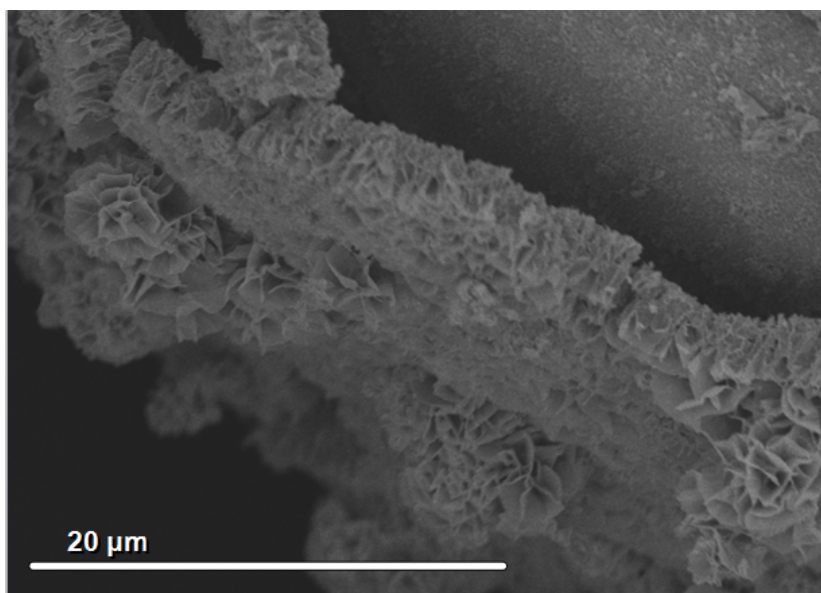

**Figure S1** SEM images of Co<sub>3</sub>O<sub>4</sub> layer directly electrodeposited on nickel foam (CN), showing the detachment of the layer from nickel foam. If using nickel foam without TiO<sub>2</sub> fiber mesh as the substrate, the Co<sub>3</sub>O<sub>4</sub> layer generated would be peeled of the substrate easily.

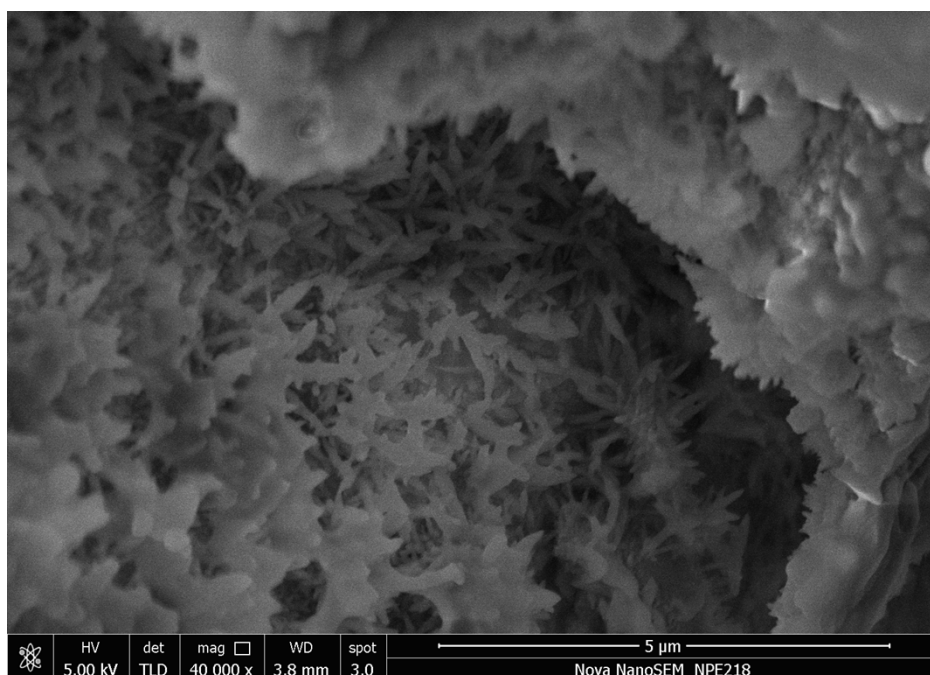

**Figure S2** SEM image of CTN discharged/charged within a voltage window of 1.8 to 4.4 V at a current density of 200 mA g<sup>-1</sup> for 80 cycles. Without the presence of Co<sub>3</sub>O<sub>4</sub> spheres, the electrochemically deposited Co<sub>3</sub>O<sub>4</sub> layer would detach from the substrate, leading to the decrease of the capacity.
